# Supplementary material for: Citrus PH4–Noemi regulatory complex is involved in proanthocyanidin biosynthesis via a positive feedback loop
Source: PubMed Central journal article supplement — J Exp Bot. 2019 Nov 15;71(4):1306–21. doi: 10.1093/jxb/erz506 (PMC7031078; doi:10.1093/jxb/erz506), 2019-11-15
Supplement: erz506_suppl_supplementary_figures_s1-s14.pdf [file erz506_suppl_supplementary_figures_s1-s14.pdf]

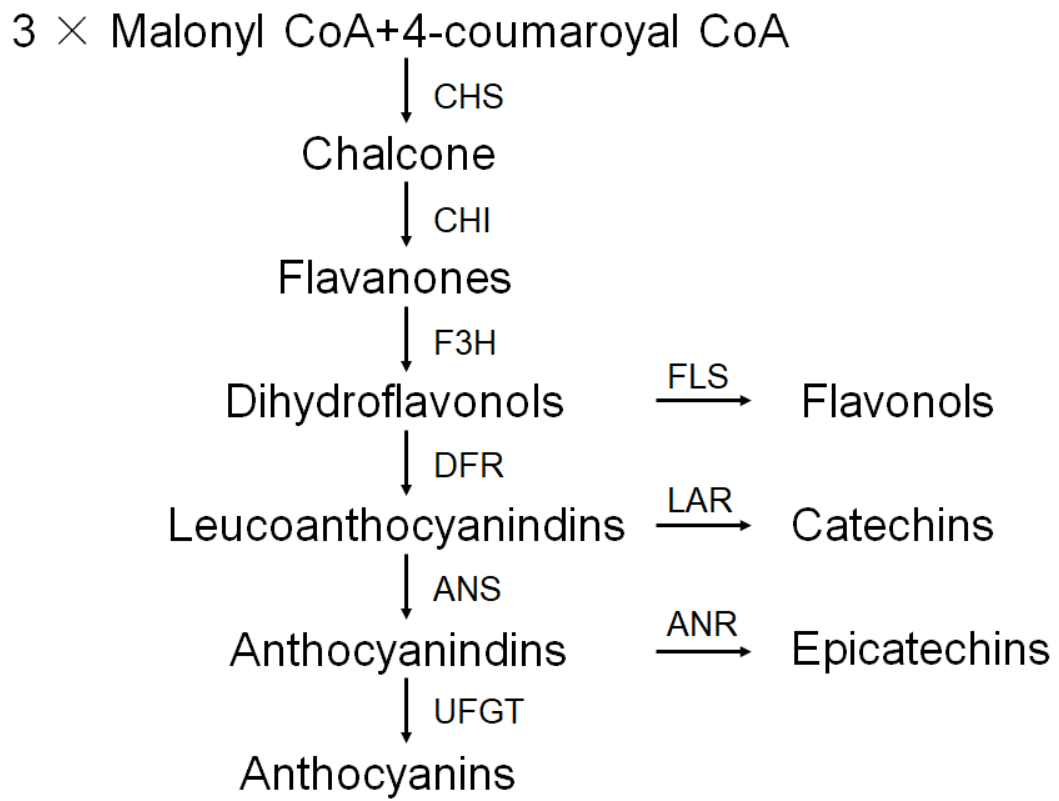

Figure S1. Simplified diagram of genes involved in flavonoid biosynthesis.

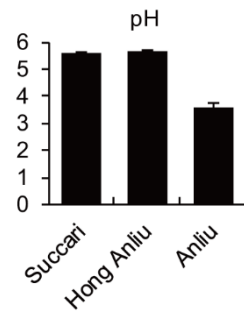

Figure S2. pH in juice from breaker stage 'Anliu', 'Hong Anliu' and 'Succari' fruits. Error bars represent the mean  $\pm$  SD of four biological replicates.

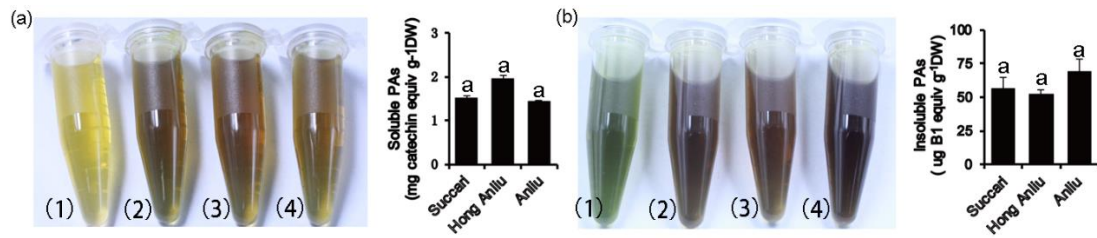

Figure S3. Characterization of PA levels of flavedos in ‘Anliu’, ‘Hong Anliu’ and ‘Succari’. (a) The contents and extracts after DMACA staining of soluble PA in flavedos. (b) The contents and extracts after DMACA staining of insoluble PA in flavedos. (1) Blank control, (2) ‘Succari’, (3) ‘Hong Anliu’, (4) ‘Anliu’. DW, dry weight. Error bars represent the mean  $\pm$  SD of three biological replicates.

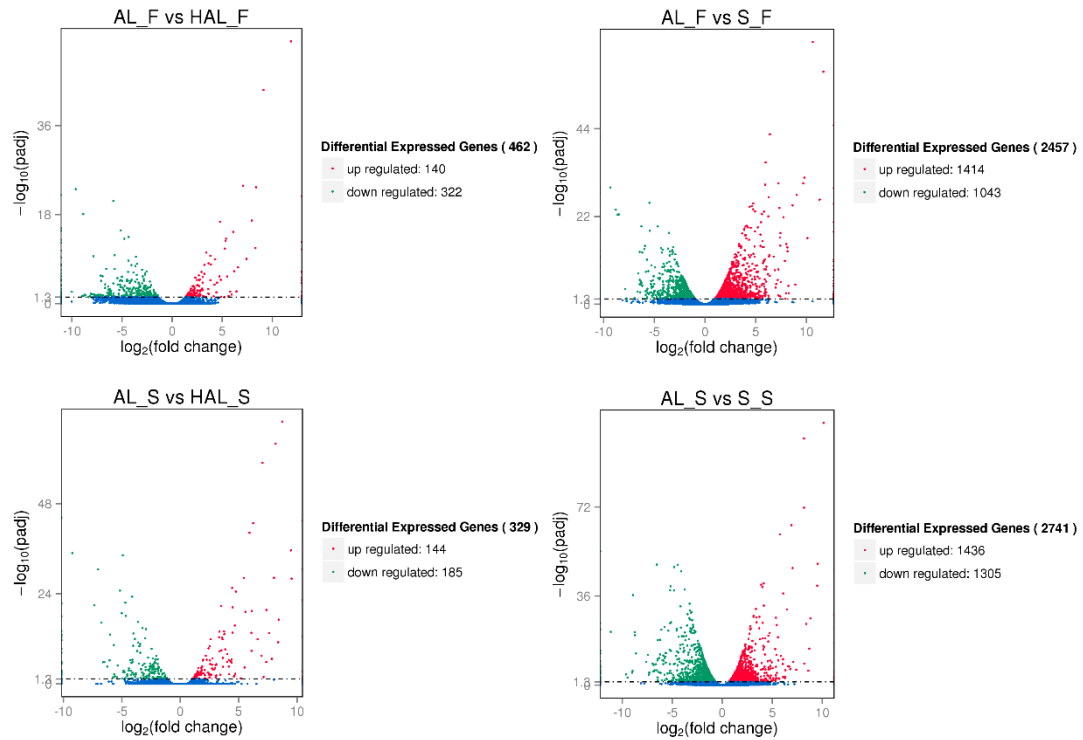

Figure S4. Volcano plots showing the whole distribution of DEGs in the AL\_F vs HAL\_F, AL\_F vs S\_F, AL\_S vs HAL\_S and AL\_S vs S\_S comparisons. Transcriptome of the ‘Anliu’ pulps (AL\_F) was compared with that of (a) ‘Hong Anliu’ pulps (HAL\_F) and (b) ‘Succari’ pulps (S\_F). Transcriptome of the ‘Anliu’ seeds (AL\_S) was compared with that of (c) ‘Hong Anliu’ seeds (HAL\_S) and (d) ‘Succari’ seeds (S\_S). The x-axis indicated  $\log_2$  of estimated fold change and the y-axis indicated negative  $\log_{10}$  of the adjusted  $P$ -value. Red and green dots represent significantly up-regulated and down-regulated genes, respectively, while blue dots represent non-significantly expressed genes.

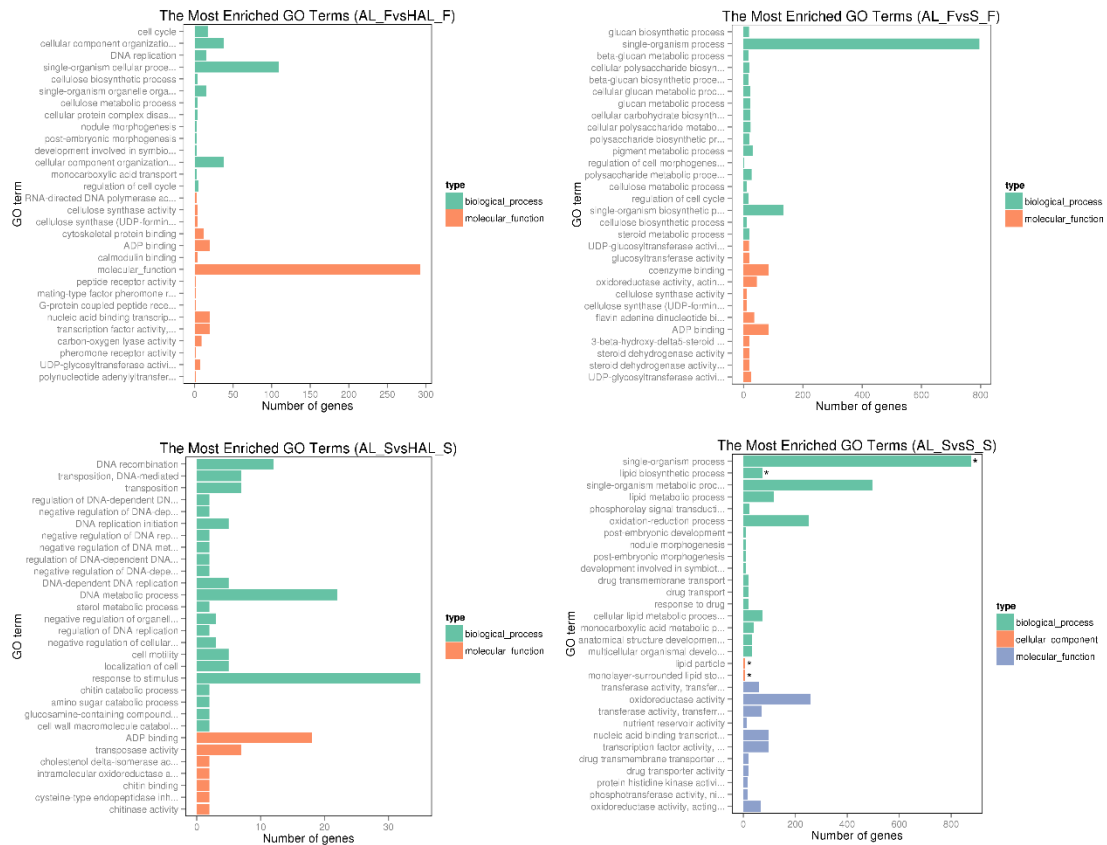

Figure S5. GO terms of DEGs in the AL\_F vs HAL\_F, AL\_F vs S\_F, AL\_S vs HAL\_S and AL\_S vs S\_S comparisons. AL\_F, ‘Anliu’ pulps; HAL\_F, ‘Hong Anliu’ pulps; S\_F, ‘Succari’ pulps; AL\_S, ‘Anliu’ seeds; HAL\_S, ‘Hong Anliu’ seeds and S\_S, ‘Succari’ seeds. The 30 GO terms with the most significant enrichment were selected and shown in the figure; if there are less than 30, all of them were shown. Asterisks indicate significantly enriched GO terms.

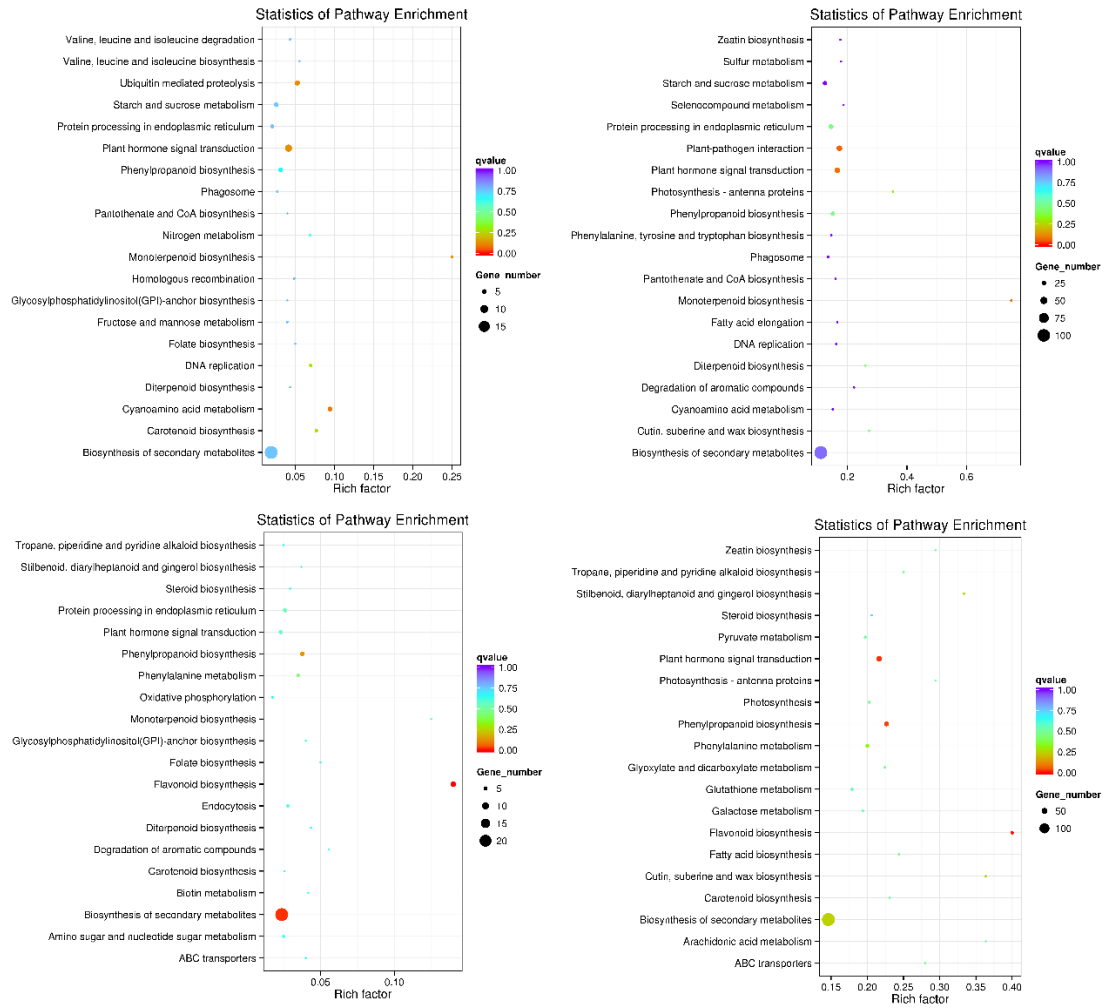

Figure S6. KEGG classifications of DEGs in the AL\_F vs HAL\_F, AL\_F vs S\_F, AL\_S vs HAL\_S and AL\_S vs S\_S comparisons. AL\_F, ‘Anliu’ pulps; HAL\_F, ‘Hong Anliu’ pulps; S\_F, ‘Succari’ pulps; AL\_S, ‘Anliu’ seeds; HAL\_S, ‘Hong Anliu’ seeds and S\_S, ‘Succari’ seeds. The y-axis represents the pathway name, the x-axis represents the rich factor, the size of the dots indicates the number of differentially expressed genes in this pathway, and the colour of the dots corresponds to different Q-value ranges.

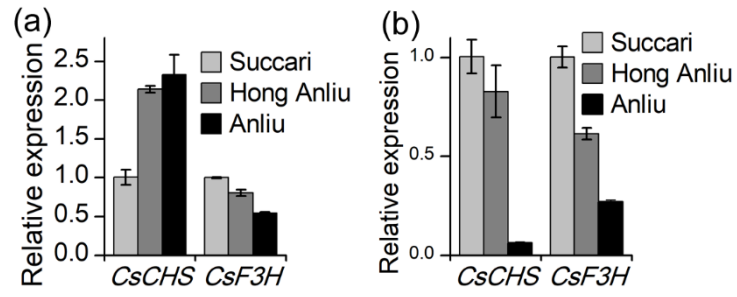

Figure S7. (a) Relative expression patterns of *CsCHS* and *CsF3H* in the seeds of the three citrus varieties. (b) Relative expression patterns of *CsCHS* and *CsF3H* in the pulps of the three citrus varieties. Error bars represent the mean  $\pm$  SD of three biological.





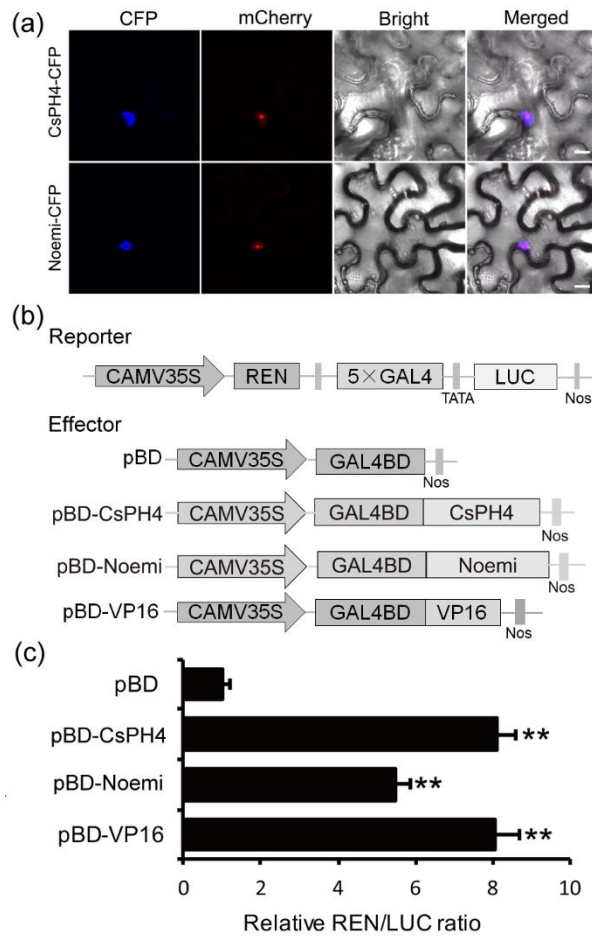

**Figure S9. Subcellular localization and transcriptional activity of *CsPH4* and *Noemi*.** (a) Subcellular localization of *CsPH4* and *Noemi* in tobacco epidermal cells. *CsPH4*-CFP and *Noemi*-CFP were co-transformed with mCherry, which was used as a nuclear marker. *CsPH4*-CFP and *Noemi*-CFP, cyan fluorescent signal; mCherry, red fluorescent signal; Bars = 10  $\mu$ m. (b) Schematic diagrams of vectors used for the transcriptional activity assay. pBD-Noemi and pBD-Noemi, vectors containing *CsPH4* and *Noemi*, respectively; pBD and pBD-VP16 served as the negative and positive controls, respectively. (c) The transcriptional activity of *CsPH4* and *Noemi*. Transcriptional activity of *CsPH4* and *Noemi* was quantified using a dual-luciferase assay. Error bars represent the mean  $\pm$  SD of eight biological replicates. Asterisks indicate significant differences relative to the empty vector control (\*\*,  $P < 0.01$ ).

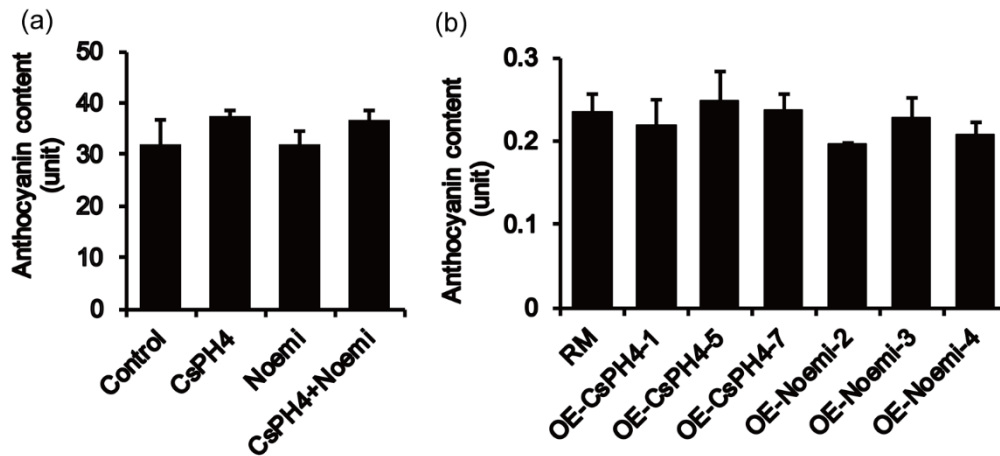

Figure S10. (a) The anthocyanin content (unit) of the transient overexpression of *CsPH4*, *Noemi*, *CsPH4* plus *Noemi* and an empty vector control in tobacco (*N. benthamiana*) leaves. (b) The anthocyanin content (unit) of transgenic citrus callus. (A530–0.25\*A657)/dry weight was considered one anthocyanin unit. Error bars represent the mean  $\pm$  SD of three biological replicates. The experiment was repeated independently three times with similar results obtained for each.

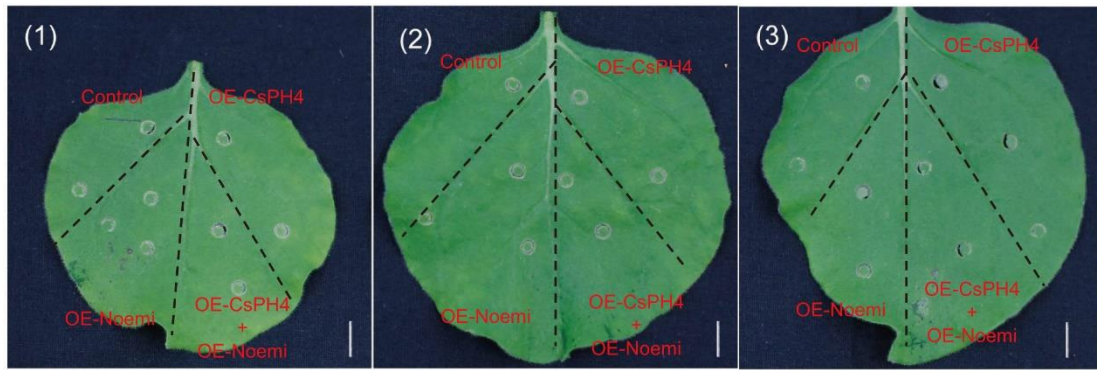

Figure S11. Phenotype of the transient overexpression of *CsPH4* (OE-CsPH4), *Noemi* (OE-Noemi), *CsPH4* plus *Noemi* (OE-CsPH4 + OE-Noemi) and an empty vector control (Control) in tobacco (*N. benthamiana*) leaves. Different regions in each tobacco leaf represent different combinations of transient overexpression. (1), (2), and (3) represent the three biological replicates. Scale bar = 1 cm.

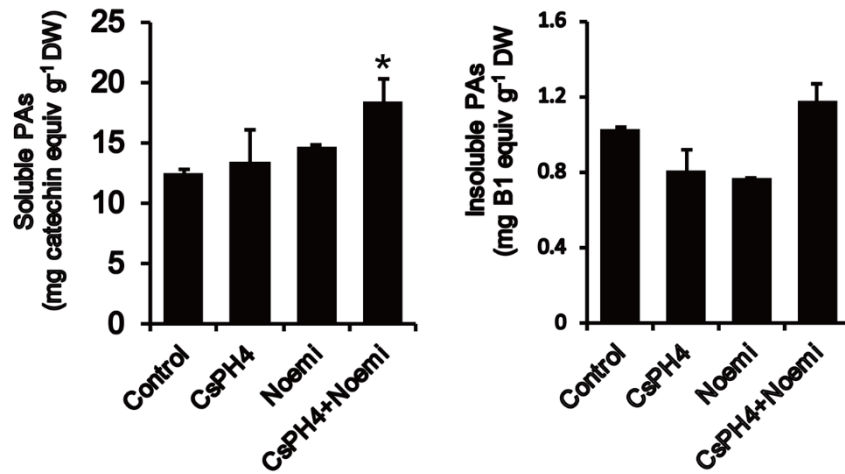

Figure S12. Characterization of PA levels of the transient overexpression of *CsPH4*, *Noemi*, *CsPH4* plus *Noemi* and an empty vector control in tobacco (*N. benthamiana*) leaves. Error bars represent the mean  $\pm$  SD of three biological replicates. Asterisks indicate significant differences relative to the empty vector control (\*,  $P < 0.05$ ).

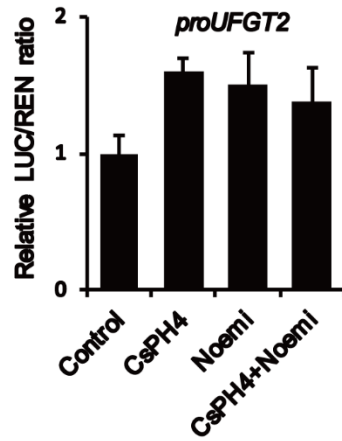

Figure S13. Transient promoter activity assays were carried out using *LUC* reporter gene under the control of the the promoters of *CsUGT2*, along with effectors (*CsPH4* + *Noemi*) and the empty vector as an internal control. Error bars represent the mean  $\pm$  SD of eight biological replicates.

(a)

```

MRNPSTSPSSTAAAAAATNKSTPCCSKVGLKRGPTPEEELLANYINKE
      R2
GEGRWRTLPKRAGLLRCGKSCRLRWNYLRPSV KRGHIAPEEDLILRLHRL
      R3          C1 Motif
LGNRWSLIAGRIPGRTDNEIKNYWNTHLSKKLISQGDPRTHKPLNQELDPSSA
DQVTNSNSKASTSKAILNSSSSNPLTPMTVSSGHL DQRHTSAGCGRMISSIM
MINKENGYSNALVDDHDSEYHQNGMMENPYTSLNCDHHHDDGGGLGR
SNNVNVFNEGLSYEVVDVINYCNDDVFSSFLNLINEAFASQHNQQVLQQ
      C3 Motif
      ΔC2
      ↓
QQQHLSNETIALPNTITGSSSDPLVSTAAASTFGLEANWESPIMASSLNQDES
      ΔC1
RRVDEHVE

```

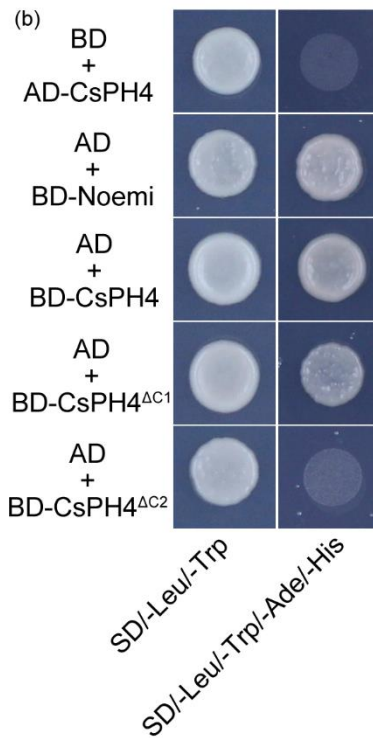

Figure S14. (a) Amino acid sequence analysis of *CsPH4*. The horizontal lines mark the conserved domains and motifs. The red triangle marks the protein truncation position. (b) The transcriptional self-activation activity assay of *CsPH4* and *Noemi* in yeast AH109. The full-length coding sequences of *CsPH4*, *Noemi* and truncated coding sequence of *CsPH4*<sup>ΔC1</sup>, *CsPH4*<sup>ΔC2</sup> were cloned into PGADT7 (AD-*CsPH4* and AD-*Noemi*) and PGBKT7 (BD-*Noemi*, BD-*CsPH4*, BD-*CsPH4*<sup>ΔC1</sup>, and BD-*CsPH4*<sup>ΔC2</sup>), respectively. The constructs BD-*CsPH4* plus AD, BD-*Noemi* plus AD, BD-*CsPH4*<sup>ΔC1</sup> plus AD, BD-*CsPH4*<sup>ΔC2</sup> plus AD, AD-*CsPH4* plus BD, and AD-*Noemi* plus BD were co-transformed into the yeast AH109. The transcriptional self-activation activity is

indicated by yeast growth. Yeast grown in SD/-Trp/-Leu medium and SD/-Trp/-Leu/-His/-Ade medium are indicated.
